# Supplementary material for: Hollow spheres of CoCr2O4–Cr2O3 mixed oxides with nanoscale heterojunctions for exclusive detection of indoor xylene
Source: Royal Society of Chemistry journal article supplement (doi:10.1039/c8tc04166k), 2018-01-01
Supplement: c8tc04166k1.pdf [file c8tc04166k1.pdf]

Supplementary Information

**Hollow spheres of  $\text{CoCr}_2\text{O}_4\text{-Cr}_2\text{O}_3$  mixed oxides  
with nanoscale heterojunctions for exclusive detection of indoor xylene**

Bo-Young Kim,<sup>a</sup> Ji-Won Yoon,<sup>a</sup> Kyeorei Lim,<sup>a</sup> Sung Hyun Park,<sup>a</sup> Ji-Wook Yoon,<sup>a,\*</sup> and Jong-Heun Lee<sup>a,\*</sup>

<sup>a</sup> Department of Materials Science and Engineering, Korea University, Seoul 02841, Republic of Korea.

\*Authors to whom correspondence should be addressed

Ji-Wook Yoon, Email: [uhpupu@korea.ac.kr](mailto:uhpupu@korea.ac.kr)

Jong-Heun Lee, Email: [jongheun@korea.ac.kr](mailto:jongheun@korea.ac.kr)

**SUPPLEMENTARY FIGURES**

**Figure S1**

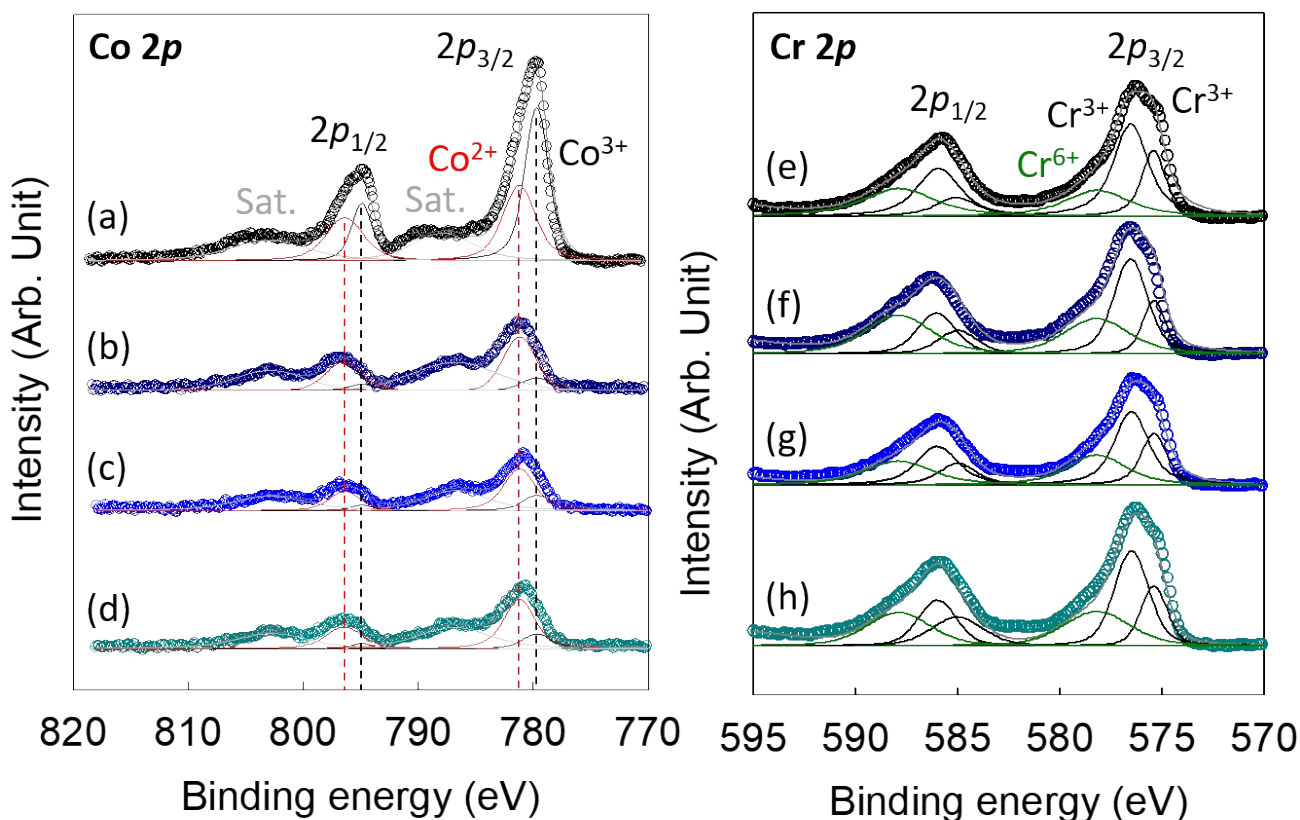

**Figure S1** XPS spectra for (a-d) Co 2p and (e-h) Cr 2p: (a) pure  $\text{Co}_3\text{O}_4$ , (b, f)  $\text{Co}_1\text{Cr}_2$ , (c, g)  $\text{Co}_1\text{Cr}_3$ , (d, h)  $\text{Co}_1\text{Cr}_4$ , and (e)  $\text{Cr}_2\text{O}_3$ .

**Figure S2**

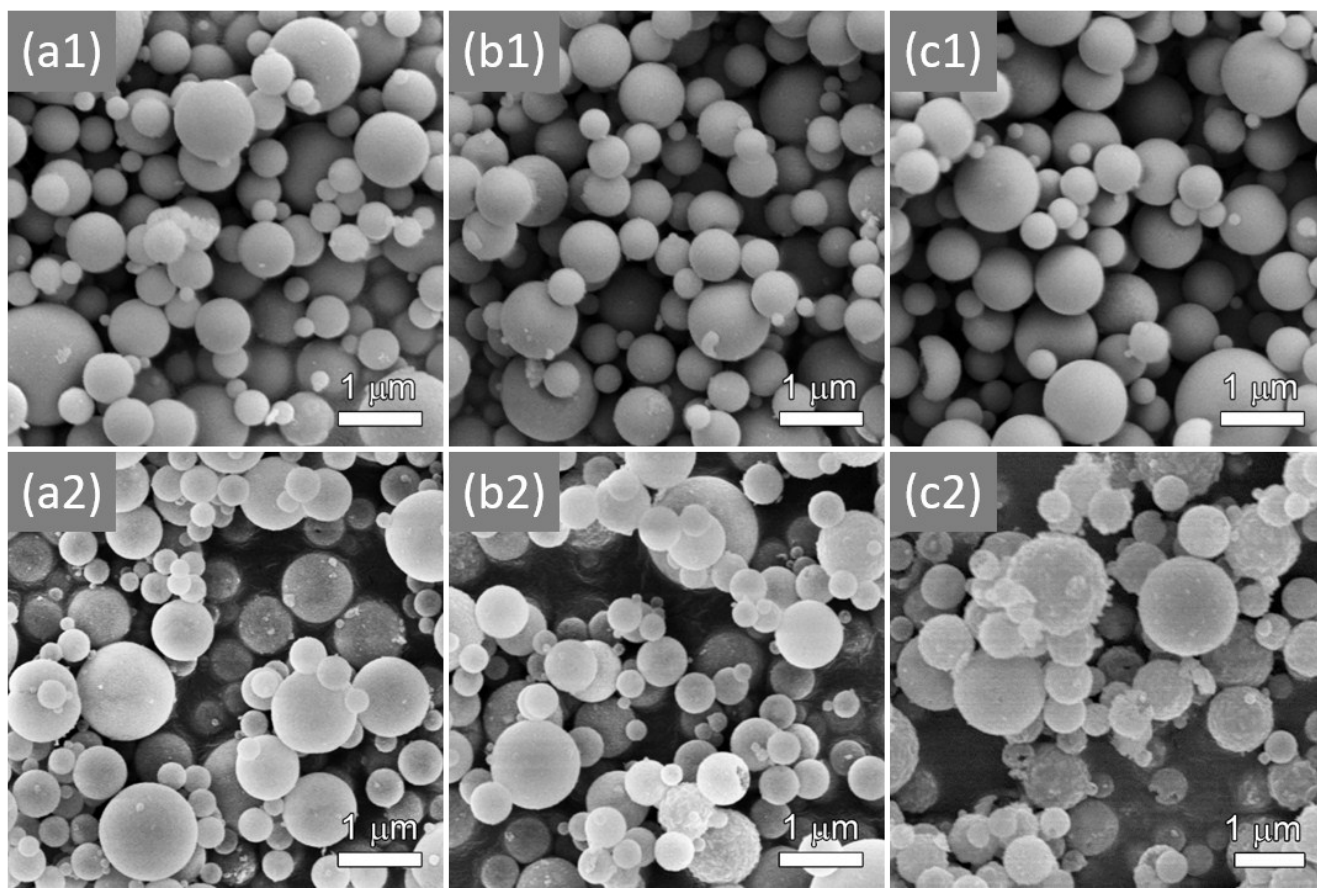

**Figure S2** SEM images for (a1, a2) Co1Cr2, (b1, b2) Co1Cr3, and (c1, c2) Co1Cr4 spheres (a1-c1) before and (a2-c2) after heat-treatment at 700 °C for 2 h.

Figure S3

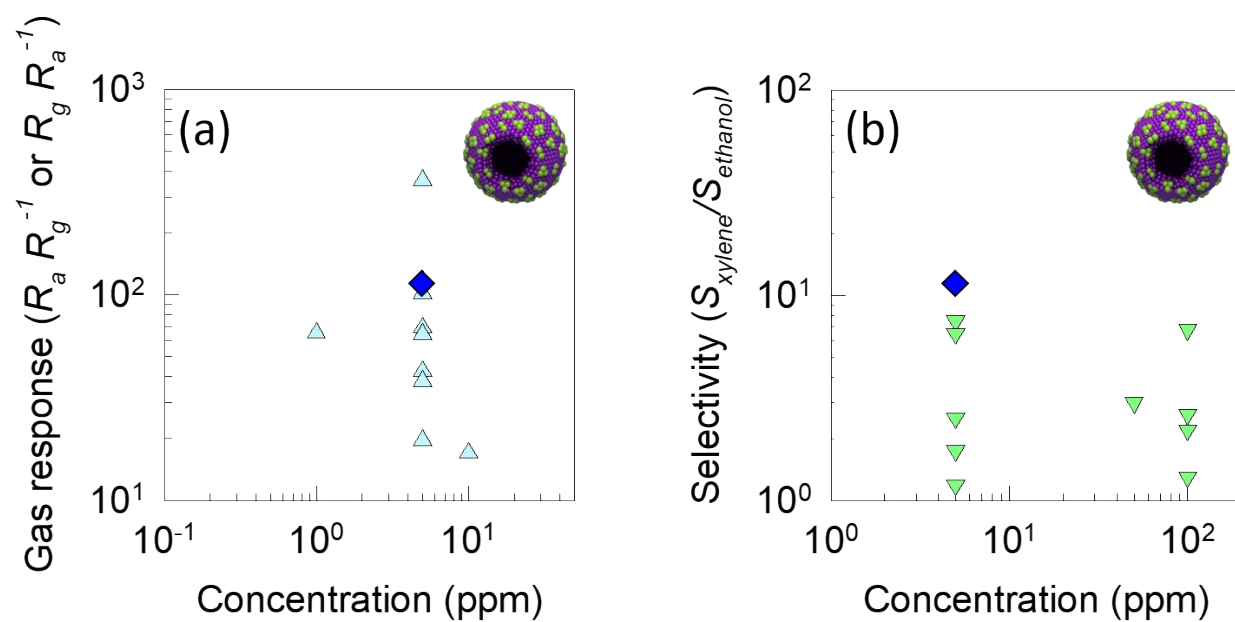

Figure S3 (a) Xylene response of Co<sub>1</sub>Cr<sub>3</sub> sensor compared to the reported values in the literature.<sup>1-9</sup> (b) Xylene selectivity of the sensor compared to that of pure Co<sub>3</sub>O<sub>4</sub> nanostructures in the literature.<sup>5,10-18</sup>

**Figure S4**

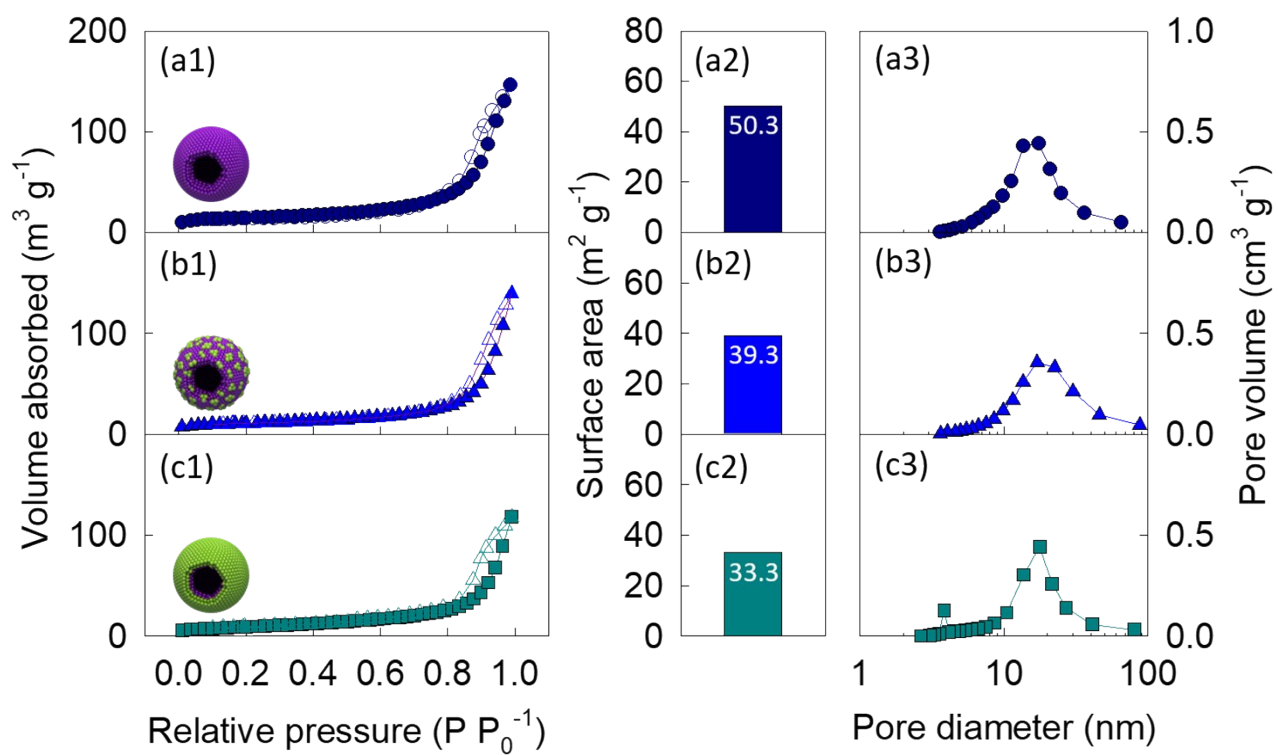

**Figure S4.** (a1-c1) N<sub>2</sub> adsorption and desorption isotherms, (a2-c2) BET surface areas, and (a3-c3) pore size distributions for (a) Co<sub>1</sub>Cr<sub>2</sub>, (b) Co<sub>1</sub>Cr<sub>3</sub>, and (c) Co<sub>1</sub>Cr<sub>4</sub> spheres.

Figure S5

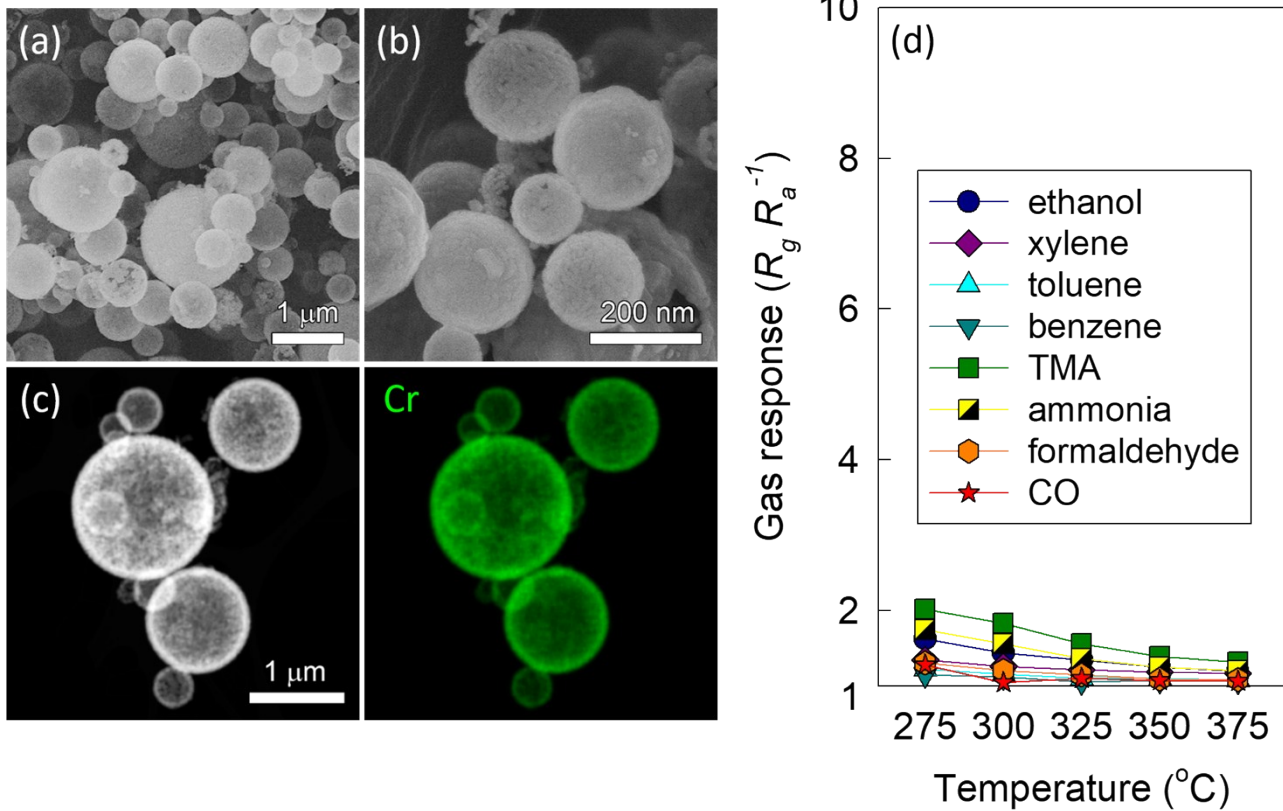

Figure S5. (a, b) SEM and (c) STEM images of pure  $\text{Cr}_2\text{O}_3$  spheres. (d) Gas responses of the sensor to 5 ppm ethanol, xylene, toluene, benzene, trimethylamine, ammonia, formaldehyde, and carbon monoxide at the same temperature.

Figure S6

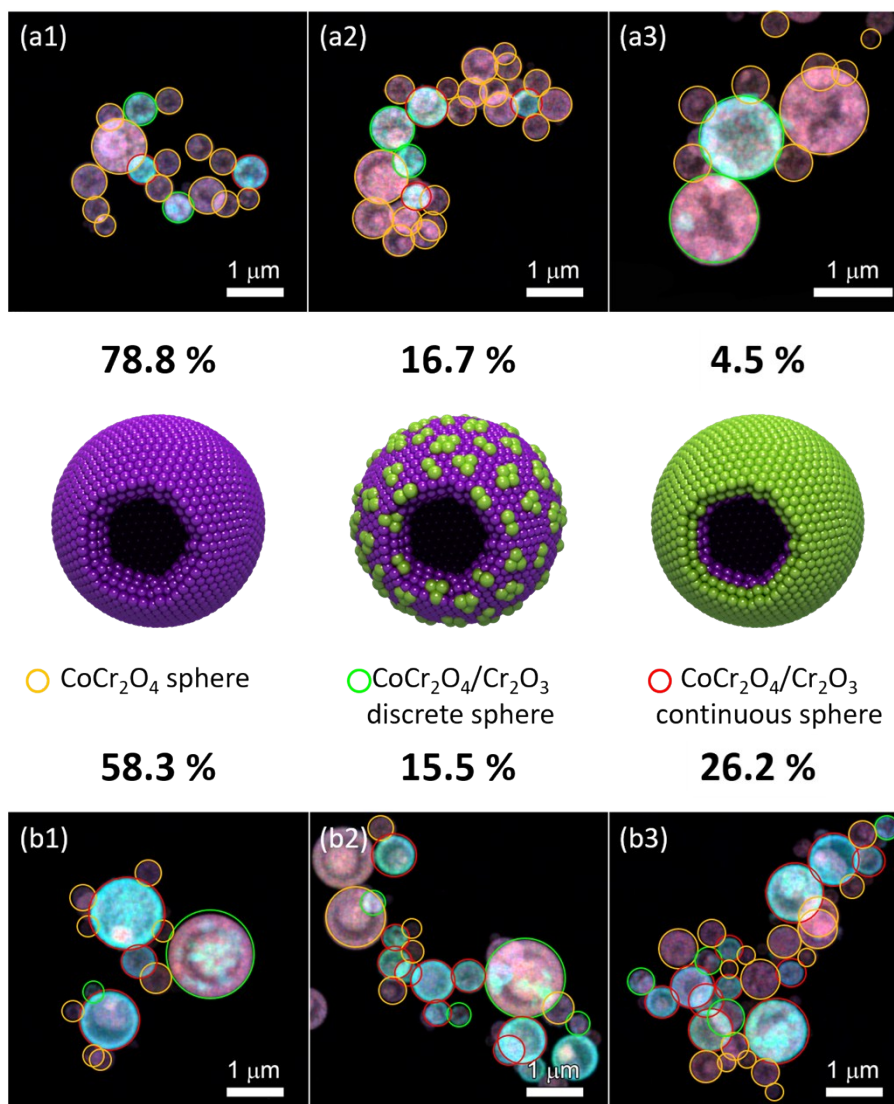

Figure S6. Results of the statistical analysis using the elemental mapping images for (a) Co1Cr3 and (b) Co1Cr4 spheres.

**Figure S7**

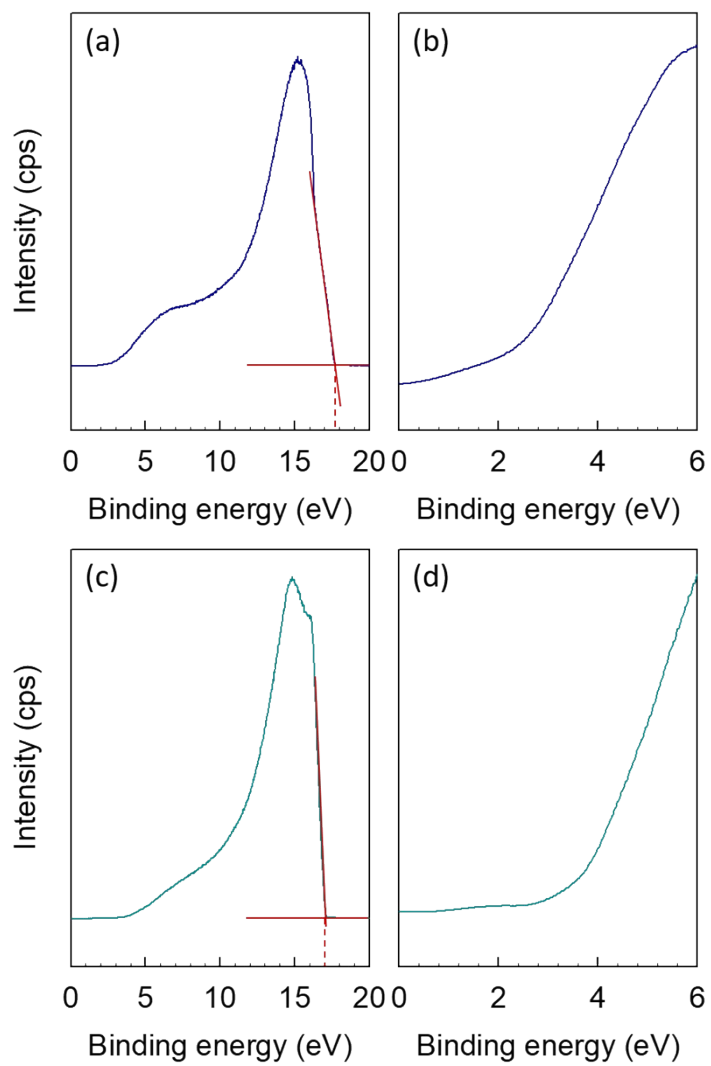

**Figure S7.** The UPS spectra for (a, b) CoCr<sub>2</sub>O<sub>4</sub> and (c, d) Cr<sub>2</sub>O<sub>3</sub>.

## REFERENCES

- 1 J.-H. Kim, H.-M. Jeong, C. W. Na, J.-W. Yoon, F. Abdel-Hady, A. A. Wazzan and J.-H. Lee, *Sens. Actuators, B*, 2016, **235**, 498–506
- 2 B.-Y. Kim, J. H. Ahn, J.-W. Yoon, C.-S. Lee, Y. C. Kang, F. Abdel-Hady, A. A. Wazzan and J.-H. Lee, *ACS Appl. Mater. Interfaces*, 2016, **8**, 34603–34611
- 3 H.-S. Woo, C.-H. Kwak, J.-H. Chung and J.-H. Lee, *Sens. Actuators, B*, 2015, **216**, 358–366
- 4 H.-S. Woo, C.-H. Kwak, J.-H. Chung and J.-H. Lee, *ACS Appl. Mater. Interfaces*, 2014, **6**, 22553–22560
- 5 J.-W. Yoon, Y. J. Hong, G. D. Park, S.-J. Hwang, F. Abdel-Hady, A. A. Wazzan, Y. C. Kang and J.-H. Lee, *ACS Appl. Mater. Interfaces*, 2015, **7**, 7717–7723
- 6 Citations should M. Chen, Y. Zhang, J. Zhang, K. Li, T. Lv, K. Shen, Z. Zhu and Q. Liu, *J. Mater. Chem. C*, 2018, **6**, 6138–6145
- 7 K. Xu, J. Zou, S. Tian, Y. Yang, F. Zeng, T. Yu, Y. Zhang, X. Jie and C. Yuan, *Sens, Actuators B*, 2017, **246**, 68–77
- 8 S.-J. Hwang, K.-I. Choi, J.-W. Yoon, Y. C. Kang and J.-H. Lee, *Chem. Eur. J.*, 2015, **21**, 5872–5878
- 9 B.-Y. Kim, J.-W. Yoon, J. K. Kim, Y. C. Kang and J.-H. Lee, *ACS Appl. Mater. Interfaces*, 2018, **10**, 16605–16612
- 10 C. Sun, X. Su, F. Xiao, C. Niu and J. Wang, *Sens, Actuators B*, 2011, **157**, 681–685



- 11 Z. Wen, L. Zhu, W. Mei, L. Hu, Y. Li, L. Sun, H. Cai and Z. Ye, *Sens. Actuators B*, 2013, **186**, 172–179
- 12 F. Qu, C. Feng, C. Li, W. Li, S. Wen, S. Ruan and H. Zhang, *Int. J. Appl. Ceram. Technol.*, 2014, **11**, 619–625
- 13 H.-M. Jeong, H.-J. Kim, P. Rai, J.-W. Yoon and J.-H. Lee, *Sens. Actuators B*, 2014, **201**, 482–489
- 14 J. Zhang, P. Tang, T. Liu, Y. Feng, C. Blackman and D. Li, *J. Mater. Chem. A*, 2017, **5**, 10387–10397
- 15 B. Zhang, X. Zhou, C. Jiang, F. Qu and M. Yang, *Mater. Lett.*, 2018, **218**, 127–130
- 16 H.-M. Jeong, J.-H. Kim, S.-Y. Jeong, C.-H. Kwak and J.-H. Lee, *ACS Appl. Mater. Interfaces*, 2016, **8**, 7877–7883
- 17 Y.-M. Jo, T.-H. Kim, C.-S. Lee, K. R. Lim, C. W. Na, F. Abdel-Hady, A. A. Wazzan and J.-H. Lee, *ACS Appl. Mater. Interfaces*, 2018, **10**, 8860–8868
- 18 C.-S. Lee, Z. Dai, S.-Y. Jeong, C.-H. Kwak, B.-Y. Kim, D. H. Kim, H. W. Jang, J.-S. Park and J.-H. Lee, *Chem. -Eur. J.*, 2016, **22**, 7102–7107
